# Supplementary material
Source: MDPI journal article supplement (https://www.mdpi.com/1424-8247/15/9/1106)
Supplement: s1 [file s1]

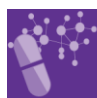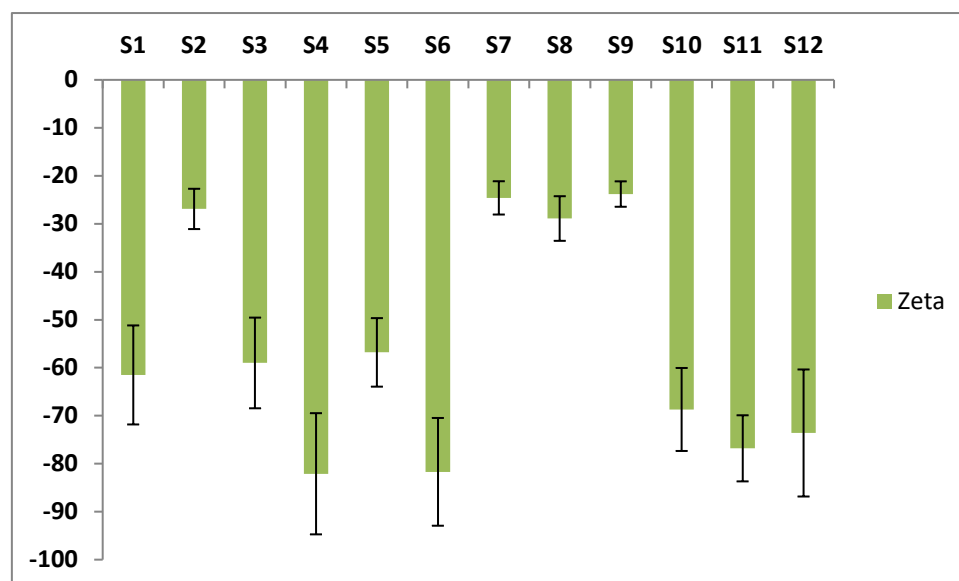

Figure S1. Zeta potential of DNA-BSVCs formulation.

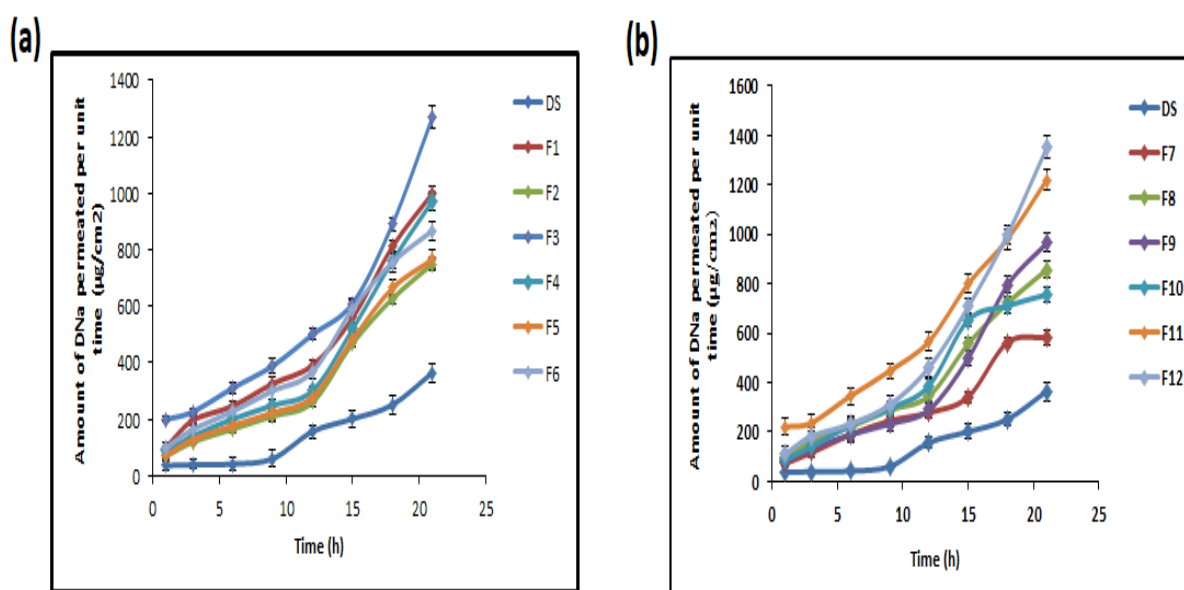

Figure S2. Permeation profile of DNA from drug solution and different BSVCs formulation: (a) F1–F6 and (b) F7–F12.
